# Supplementary material for: Nb2O5 nanowire photoanode sensitized by a composition-tuned CdSxSe1−x shell
Source: Royal Society of Chemistry journal article supplement (doi:10.1039/c2jm16008k), 2012-01-01

## Supporting Information

### Nb<sub>2</sub>O<sub>5</sub> Nanowire Photoanode Sensitized by Composition-Tuned

### CdS<sub>x</sub>Se<sub>1-x</sub> Shell

*Jun Ha Kang, Yoon Myung, Jin-Woong Choi, Dong Myung Jang, Chi Woo Lee,*

*Jeunghee Park,\* and Eun Hee Cha.*

**Table S1:** Composition and area fraction of two or three resolved XRD CdS<sub>1-x</sub>Se<sub>x</sub> (110) peaks and average mole fraction.

| <i>x</i>   | P1    |                       |                       | P2    |                       |                       | P3    |                       |                       | <i>x</i> <sub>avg</sub> <sup>1</sup> |
|------------|-------|-----------------------|-----------------------|-------|-----------------------|-----------------------|-------|-----------------------|-----------------------|--------------------------------------|
|            | 2θ    | <i>x</i> <sub>1</sub> | <i>f</i> <sub>1</sub> | 2θ    | <i>x</i> <sub>2</sub> | <i>f</i> <sub>2</sub> | 2θ    | <i>x</i> <sub>3</sub> | <i>f</i> <sub>3</sub> |                                      |
| <b>0</b>   | 41.95 | 0                     | 1                     |       |                       |                       |       |                       |                       | 0                                    |
| <b>0.1</b> | 42.09 | 0.08                  | 1                     |       |                       |                       |       |                       |                       | 0.08                                 |
| <b>0.3</b> | 42.12 | 0.10                  | 0.66                  |       |                       |                       | 43.21 | 0.73                  | 0.34                  | 0.32                                 |
| <b>0.4</b> | 42.07 | 0.07                  | 0.53                  | 42.59 | 0.38                  | 0.15                  | 43.54 | 0.91                  | 0.32                  | 0.38                                 |
| <b>0.6</b> | 42.06 | 0.07                  | 0.29                  | 42.47 | 0.31                  | 0.10                  | 43.50 | 0.89                  | 0.61                  | 0.60                                 |
| <b>0.8</b> |       |                       |                       | 42.81 | 0.50                  | 0.25                  | 43.59 | 0.94                  | 0.75                  | 0.83                                 |
| <b>0.9</b> |       |                       |                       |       |                       |                       | 43.58 | 0.94                  | 1                     | 0.94                                 |
| <b>1</b>   |       |                       |                       |       |                       | .                     | 43.70 | 1.00                  | 1                     | 1                                    |

$$^1 x_{avg} = \sum x_i f_i$$

**Figure S1:** XRD patterns of as-grown Nb<sub>2</sub>O<sub>5</sub> NW on the Nb foil substrates and the Nb<sub>2</sub>O<sub>5</sub> NW powder forms separated from the substrates. The peaks of the Nb<sub>2</sub>O<sub>5</sub> NW match well to those of the monoclinic phase bulk (JCPDS Card No. 37-1468)

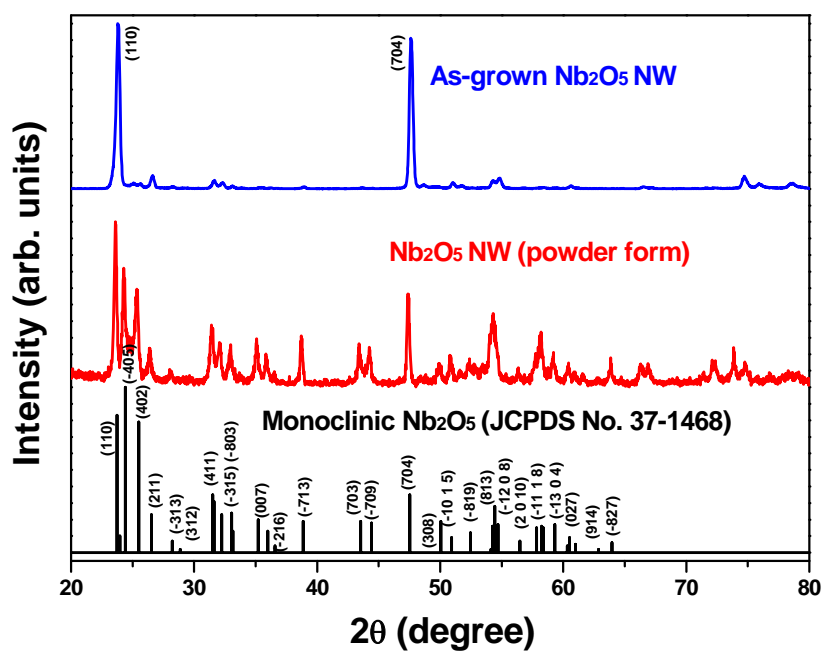

**Figure S2.** (a) Current density (mA/cm<sup>2</sup>) versus potential for Nb<sub>2</sub>O<sub>5</sub>-CdS<sub>1-x</sub>Se<sub>x</sub> photoelectrodes measured in dark conditions. (b) The value of open circuit voltage in dark is plotted as a function of  $x$  (S composition).

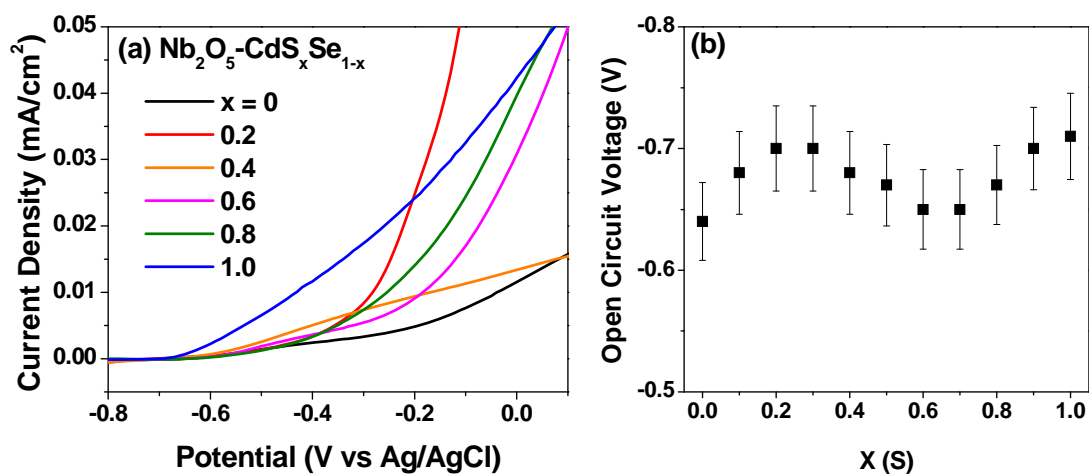

Supplement: c2jm16008k.pdf [file c2jm16008k.pdf]
